# Supplementary material
Source: PubMed Central journal article supplement (PMC4216517)
Supplement: Supp_Fig2.pdf [file Supp_Fig2.pdf]

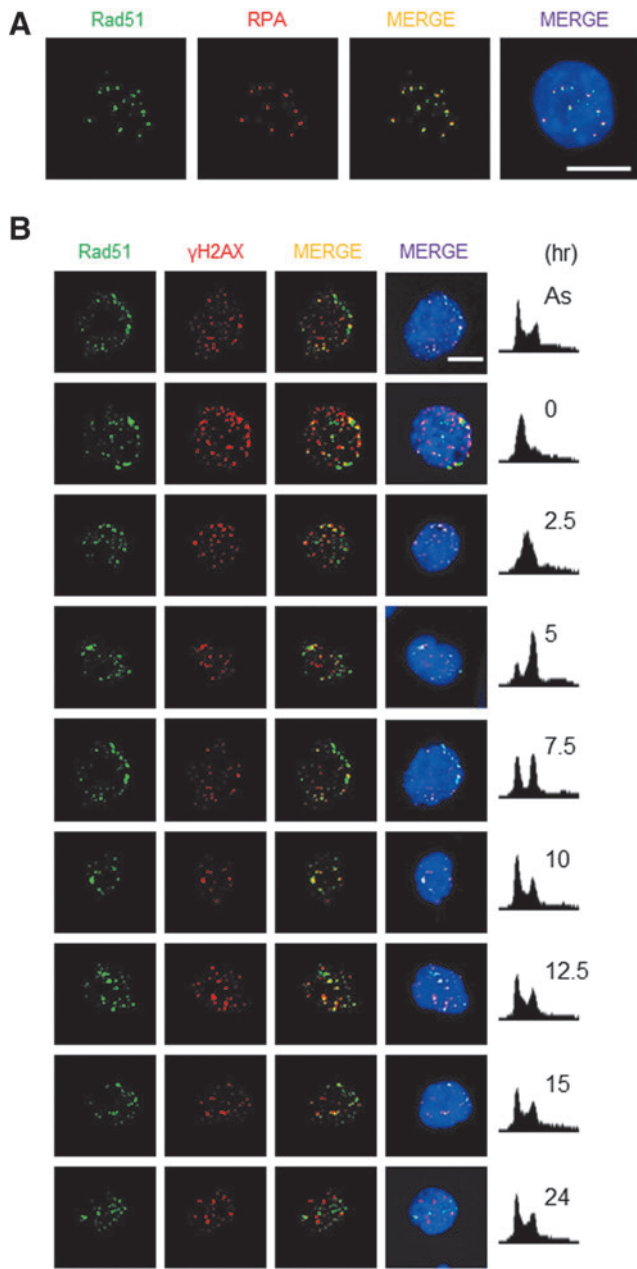

**SUPPLEMENTARY FIG. S2.** Formation of Rad51 foci during the cell cycle in mESCs. **(A)** Colocalization of Rad51 and RPA in asynchronous mESCs. The scale bar indicates 10  $\mu$ m. **(B)** Representative images of cells forming Rad51 foci at the indicated time points. The same samples shown in Fig. 2A were costained for  $\gamma$ H2AX. The cell cycle phases are indicated in the FACS profiles (*right*). The scale bar indicates 10  $\mu$ m.
