# Supplementary material
Source: PubMed Central journal article supplement (PMC4216517)
Supplement: Supp_Fig3.pdf [file Supp_Fig3.pdf]

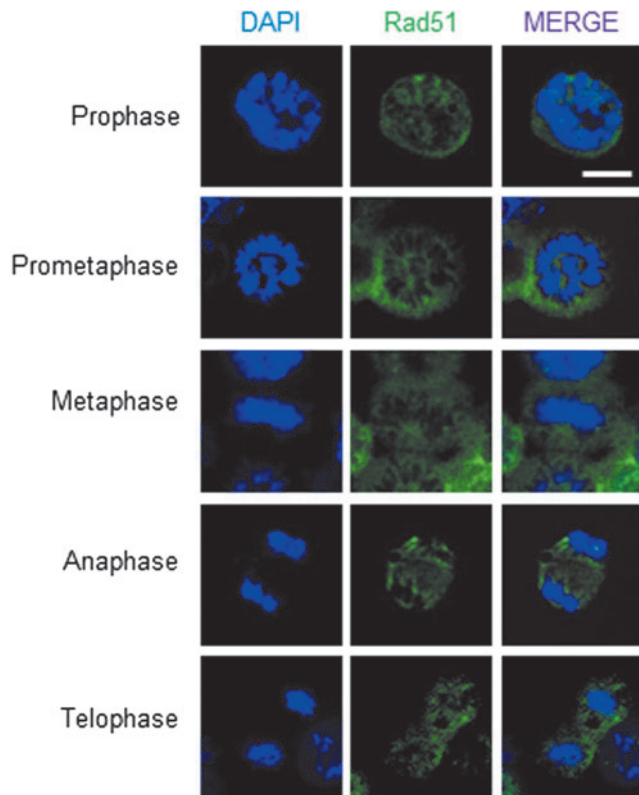

**SUPPLEMENTARY FIG. S3.** Rad51 localization during mitosis. Mitotic cells were subclassified into five stages. Each mitotic phase was determined by DAPI staining. The samples were imaged from 5 to 7.5 h after release from a double-thymidine block.
