# Supplementary material
Source: PubMed Central journal article supplement (PMC4216517)
Supplement: Supp_Fig4.pdf [file Supp_Fig4.pdf]

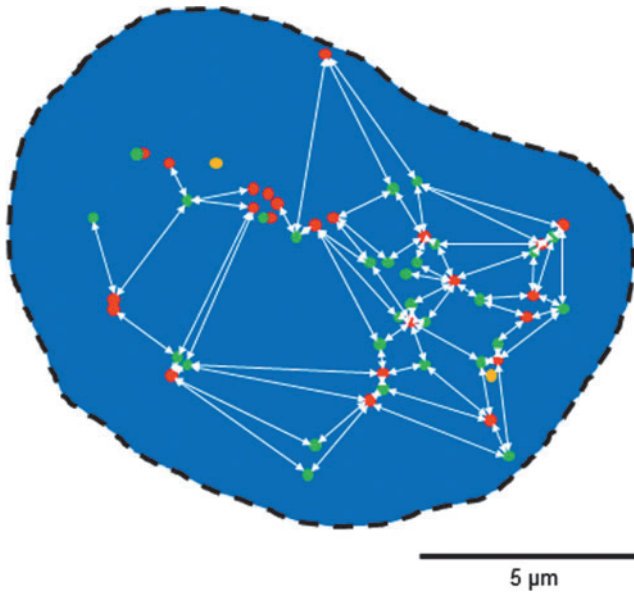

**SUPPLEMENTARY FIG. S4.** Crosstalk between Rad51 foci and DNA replication. Scheme for the measurement of Rad51 and ORC2 nuclear foci distances in mESCs. The distance between Rad51 and ORC2 foci was measured using a single ORC2 entity as the center (*red*: Rad51; *green*: ORC2; *yellow*: colocalization).
