# Supplementary material
Source: PubMed Central journal article supplement (PMC4216517)
Supplement: Supp_Fig6.pdf [file Supp_Fig6.pdf]

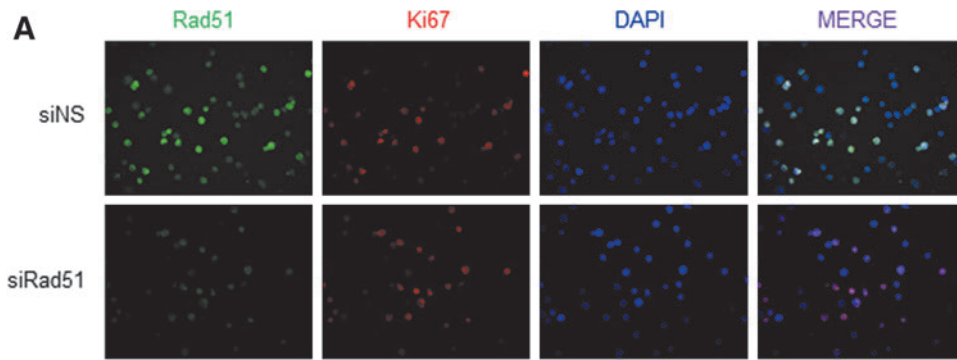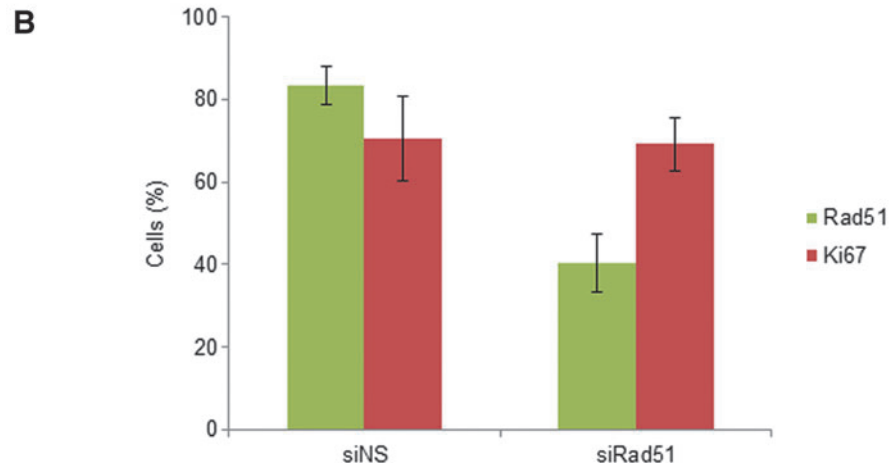

**SUPPLEMENTARY FIG. S6.** Insensitiveness of Rad51 knockdown to cellular senescence. (A) Cells were immunostained with anti-Ki67 antibody after siRNA transfection for 48 h. (B) The level of Rad51 and the relative proportion of Ki67-positive cells are shown. Error bars indicate mean  $\pm$  SD.
