# Supplementary material
Source: PubMed Central journal article supplement (PMC4216517)
Supplement: Supp_Fig7.pdf [file Supp_Fig7.pdf]

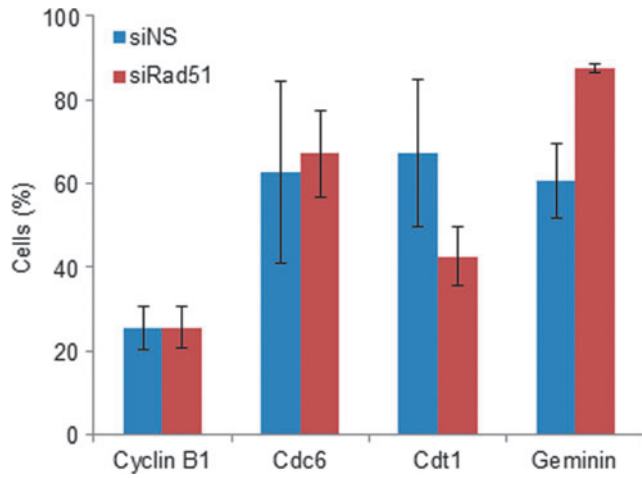

**SUPPLEMENTARY FIG. S7.** The change of cell cycle status after Rad51 knockdown. Cells were immunostained with antibody for cell cycle markers after siRNA transfection for 48 h. The relative proportion of cells to express respective cell cycle markers is shown in the plot. Error bars indicate mean  $\pm$  SD.
