# Supplementary material
Source: PubMed Central journal article supplement (PMC4216517)
Supplement: Supp_Fig8.pdf [file Supp_Fig8.pdf]

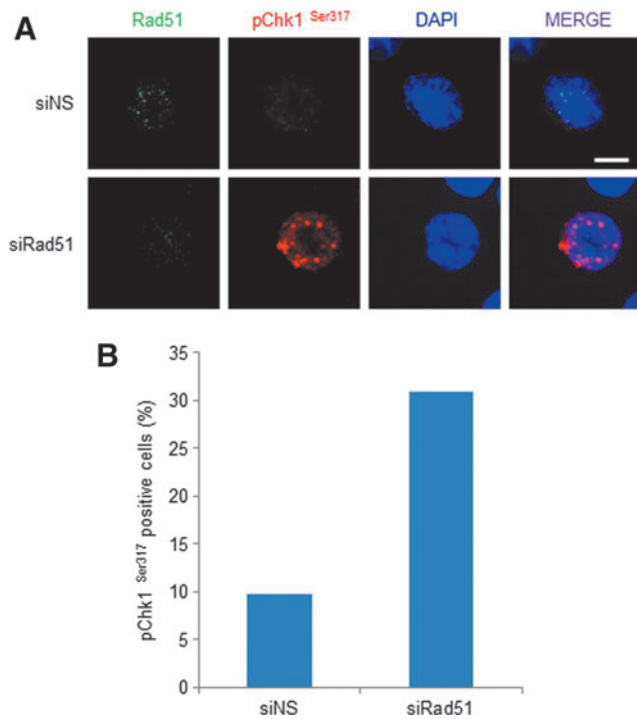

**SUPPLEMENTARY FIG. S8.** DNA damage checkpoint activation by Rad51 knockdown. **(A)** Anti-phospho-Chk1<sup>Ser317</sup> antibody was used to immunostain Rad51-knockdown cells. Nuclei were visualized with DAPI staining. The scale bar indicates 10  $\mu$ m. **(B)** Phospho-Chk1<sup>Ser317</sup>-positive cells ( $n=200$ ) were counted and quantified.
