# Supplementary material
Source: PubMed Central journal article supplement (PMC4216517)
Supplement: Supp_Fig9.pdf [file Supp_Fig9.pdf]

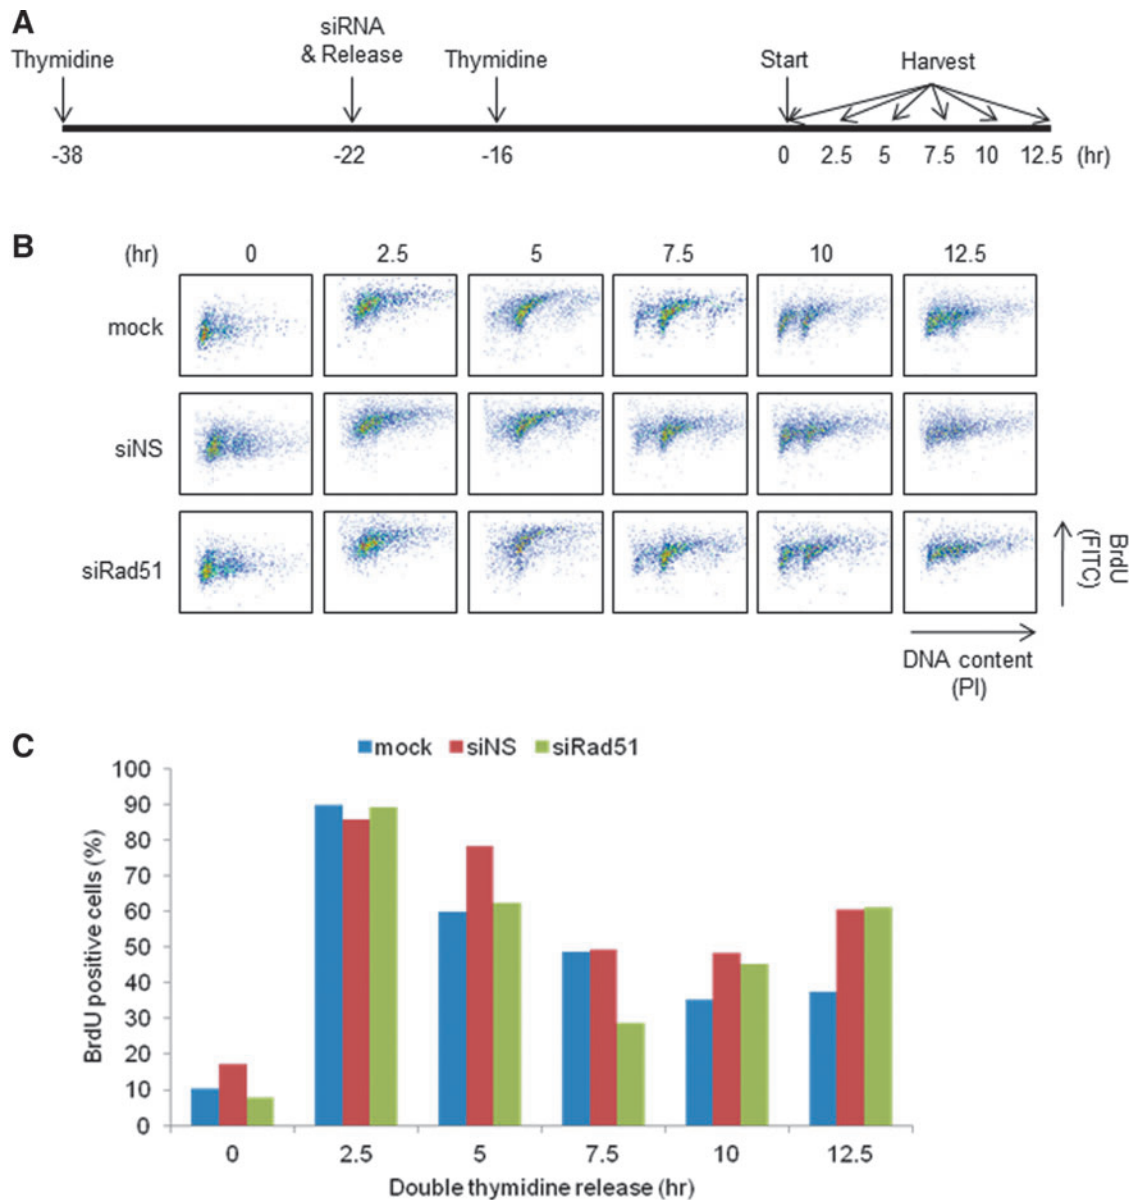

**SUPPLEMENTARY FIG. S9.** Analysis of cell cycle progression regarding DNA replication. **(A)** Scheme used in **(B)**. Synchronization and siRNA treatment are described in “Materials and Methods” section. **(B)** After Rad51 knockdown, the amount of incorporated BrdU after release from a double thymidine was assessed. mESCs were treated as described. The same number of BrdU-positive cells was measured by FACS (PI: propidium iodide staining; BrdU: anti-BrdU staining). **(C)** The number of BrdU-positive cells in **(B)** at each cell cycle phase was quantified using FlowJo software.
