# Supplementary material
Source: PubMed Central journal article supplement (PMC4216517)
Supplement: Supp_Fig10.pdf [file Supp_Fig10.pdf]

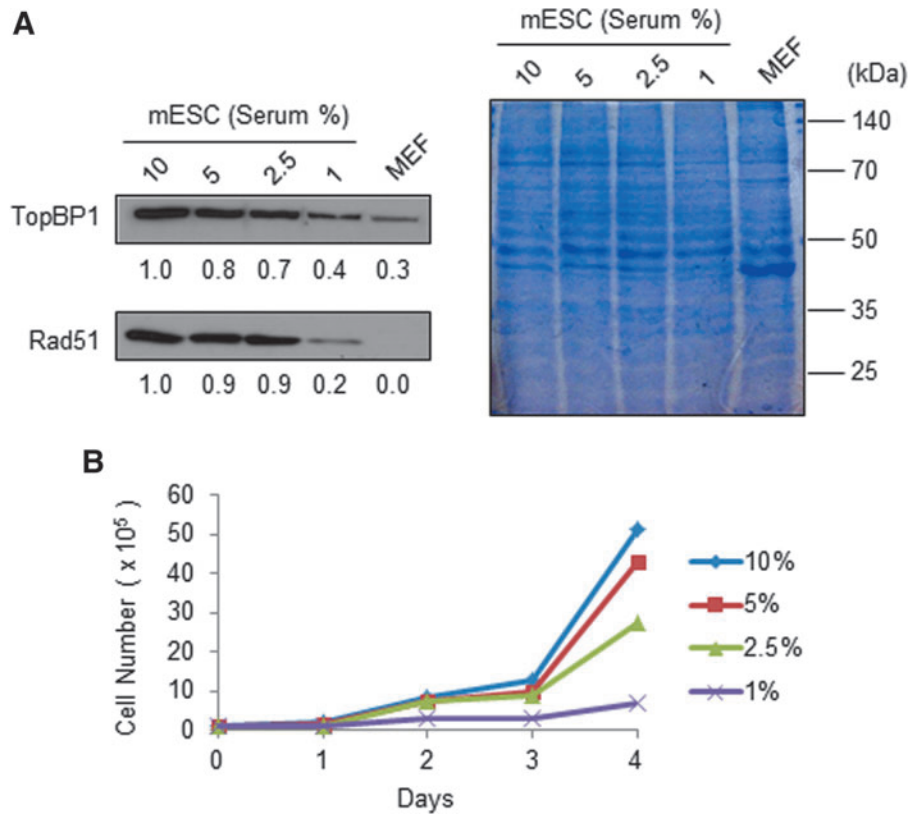

**SUPPLEMENTARY FIG. S10.** The effect of Rad51 on nutrient insufficiency in mESCs. **(A)** mESCs in exponential growth phase were transferred to and maintained in various serum concentrations as indicated. mESCs were harvested on day 4, and protein levels in mESCs and MEFs were compared. A MEF sample was used as a control for Rad51 protein expression in immunoblot analysis. The ratio of protein was normalized to the first lane using Quantity One software. A Coomassie brilliant blue (CBB) staining was shown to ensure the equal loading of each lysates (*right*). **(B)** The number of cells growing in different concentrations of serum was counted every day using a hemocytometer.
