# Supplementary material
Source: PubMed Central journal article supplement (PMC4216517)
Supplement: Supp_Table1.pdf [file Supp_Table1.pdf]

SUPPLEMENTARY TABLE S1. PRIMER SEQUENCES USED  
IN QUANTITATIVE POLYMERASE CHAIN REACTION

| <i>Gene</i>        | <i>Sequence</i>                                                                     |
|--------------------|-------------------------------------------------------------------------------------|
| <i>GAPDH</i>       | Forward: GGG TGT GAA CCA TGA GAA<br>Reverse: GTC TTC TGG GTG GCA GTG AT             |
| <i>Nestin</i>      | Forward: CTG CAG GCC ACT GAA AAG T<br>Reverse: TTC CAG GAT CTG AGC GAT CT           |
| <i>Fgf5</i>        | Forward: TCT CAC TCC CGA AGG GCA A<br>Reverse: AGA TCT GCA GAT GGA AAC C            |
| <i>Brachyury</i>   | Forward: CAC ACC ACT GAC GCA CAC<br>Reverse: GAG GCT ATG AGG AGG CTT TG             |
| <i>VE-cadherin</i> | Forward: TCC TCT GCA TCC TCA CTA TCA CA<br>Reverse: GTA AGT GAC CAA CTG CTC GTG AAT |
| <i>Gata4</i>       | Forward: GAT GGG ACG GGA CAC TAC CTG<br>Reverse: ACC TGC TGG CGT CTT AGA TTT        |
| <i>Afp</i>         | Forward: CAC ACC CGC TTC CCT CAT CC<br>Reverse: TTC TTC TCC GTC ACG CAC TGG         |
| <i>Mash2</i>       | Forward: GGG ATC TGC ACT CGA GGA TTT<br>Reverse: CGT CCA TCA AGC TTG CAT TCA        |
| <i>Cdx2</i>        | Forward: CCT GCG ACA AGG GCT TGT TTA G<br>Reverse: TCC CGA CTT CCC TTC ACC ATA C    |
